# Supplementary material
Source: PubMed Central journal article supplement (PMC4554207)
Supplement: ry141208suppa1.pdf [file ry141208suppa1.pdf]

**Table E1. Raw Data of Use and Yield of CT Pulmonary Angiography and Hospital Admissions per Month**

| Month          | No. of Examinations Performed | No. of Admissions per Month | No. of Positive Examinations per Month | Use of CTPA per 1000 Admissions | Yield of CTPA (%) |
|----------------|-------------------------------|-----------------------------|----------------------------------------|---------------------------------|-------------------|
| April 2007     | 117                           | 3665                        | 10                                     | 31.9                            | 8.5               |
| May 2007       | 104                           | 3895                        | 13                                     | 26.7                            | 12.5              |
| June 2007      | 94                            | 3809                        | 10                                     | 25.5                            | 10.3              |
| July 2007      | 108                           | 3801                        | 15                                     | 28.4                            | 13.9              |
| August 2007    | 99                            | 4024                        | 11                                     | 24.6                            | 11.1              |
| September 2007 | 99                            | 3689                        | 12                                     | 26.8                            | 12.1              |
| October 2007   | 105                           | 3882                        | 12                                     | 27                              | 11.4              |
| November 2007  | 104                           | 3761                        | 17                                     | 27.7                            | 16.3              |
| December 2007  | 111                           | 3591                        | 11                                     | 30.9                            | 9.9               |
| January 2008   | 80                            | 3740                        | 14                                     | 21.4                            | 7.7               |
| February 2008  | 102                           | 3618                        | 10                                     | 28.2                            | 9.9               |
| March 2008     | 117                           | 3737                        | 9                                      | 31.3                            | 17.5              |
| April 2008     | 111                           | 3770                        | 11                                     | 29.4                            | 9.8               |
| May 2008       | 100                           | 3886                        | 11                                     | 25.7                            | 7.7               |
| June 2008      | 101                           | 3846                        | 10                                     | 26.3                            | 9.9               |
| July 2008      | 97                            | 3871                        | 8                                      | 25.1                            | 8.2               |
| August 2008    | 100                           | 3959                        | 7                                      | 25.3                            | 7                 |
| September 2008 | 103                           | 3737                        | 8                                      | 27.6                            | 7.8               |
| October 2008   | 112                           | 3991                        | 12                                     | 28.1                            | 10.7              |
| November 2008  | 99                            | 3743                        | 8                                      | 26.4                            | 8.1               |
| December 2008  | 123                           | 3730                        | 18                                     | 33                              | 14.6              |
| January 2009   | 103                           | 3800                        | 9                                      | 27.1                            | 8.1               |
| February 2009  | 91                            | 3667                        | 13                                     | 24.8                            | 14.3              |
| March 2009     | 91                            | 3836                        | 12                                     | 23.7                            | 13.2              |
| April 2009     | 94                            | 3875                        | 8                                      | 24.3                            | 8.5               |
| May 2009       | 83                            | 4037                        | 10                                     | 20.6                            | 12.0              |
| June 2009      | 96                            | 3802                        | 7                                      | 25.2                            | 7.3               |
| July 2009      | 79                            | 4041                        | 14                                     | 19.6                            | 17.7              |
| August 2009    | 125                           | 3876                        | 12                                     | 32.2                            | 9.6               |
| September 2009 | 112                           | 3803                        | 14                                     | 29.5                            | 12.5              |
| October 2009   | 110                           | 3934                        | 7                                      | 28                              | 6.4               |
| November 2009  | 85                            | 3606                        | 6                                      | 23.6                            | 7.1               |
| December 2009  | 85                            | 3813                        | 14                                     | 22.3                            | 16.5              |
| January 2010   | 77                            | 3750                        | 7                                      | 20.5                            | 9.1               |
| February 2010  | 95                            | 3561                        | 11                                     | 26.7                            | 11.6              |
| March 2010     | 77                            | 3826                        | 7                                      | 20.1                            | 9.1               |
| April 2010     | 83                            | 3864                        | 12                                     | 21.5                            | 14.5              |
| May 2010       | 95                            | 3916                        | 13                                     | 24.3                            | 13.7              |
| June 2010      | 83                            | 3817                        | 10                                     | 21.7                            | 12.0              |

|                |    |      |    |      |      |
|----------------|----|------|----|------|------|
| July 2010      | 85 | 3968 | 9  | 21.4 | 10.6 |
| August 2010    | 83 | 3903 | 11 | 21.3 | 13.3 |
| September 2010 | 84 | 3731 | 18 | 22.5 | 21.4 |
| October 2010   | 93 | 3841 | 10 | 24.2 | 10.8 |
| November 2010  | 98 | 3621 | 10 | 27.1 | 10.2 |
| December 2011  | 76 | 3857 | 6  | 19.7 | 7.9  |
| January 2011   | 87 | 3730 | 20 | 23.3 | 23.0 |
| February 2011  | 74 | 3433 | 8  | 21.6 | 10.8 |
| March 2011     | 97 | 4002 | 10 | 24.2 | 10.3 |
| April 2011     | 87 | 3884 | 10 | 22.4 | 11.5 |
| May 2011       | 79 | 3797 | 2  | 20.8 | 2.5  |
| June 2011      | 85 | 3824 | 10 | 22.2 | 11.8 |
| July 2011      | 75 | 3848 | 7  | 19.5 | 9.3  |
| August 2011    | 85 | 3809 | 11 | 22.3 | 12.9 |
| September 2011 | 93 | 3786 | 10 | 24.6 | 10.8 |
| October 2011   | 88 | 3795 | 15 | 23.2 | 17.0 |
| November 2011  | 96 | 3625 | 11 | 26.5 | 11.5 |
| December 2011  | 90 | 3756 | 8  | 24   | 8.9  |
| January 2012   | 91 | 3692 | 10 | 24.6 | 11.0 |
| February 2012  | 89 | 3464 | 11 | 25.7 | 12.4 |
| March 2012     | 82 | 3784 | 8  | 21.7 | 9.8  |
| April 2012     | 67 | 3566 | 12 | 18.8 | 17.9 |
| May 2012       | 84 | 3815 | 13 | 22   | 15.5 |
| June 2012      | 72 | 3893 | 4  | 18.5 | 5.6  |

**Table E2. Regression Model Results for Monthly Use and Yield of Computed Tomography Pulmonary Angiography Pre-and Post-Implementation of Evidence-Based Clinical Decision Support (CDS)**

| Parameter                                      | Model Coefficient | P Value |
|------------------------------------------------|-------------------|---------|
| Monthly CTPA Use per 1000 Inpatient Admissions |                   |         |
| Intercept ( $\alpha_1$ )                       | 27.840            | <.001   |
| Time (mo) ( $\beta_1$ )                        | -0.062            | .27     |
| Intervention · time before/after ( $\beta_2$ ) | -5.040            | .0008   |
| Intervention*Time ( $\beta_3$ )                | 0.049             | .52     |
| Monthly Yield of CTPA positive for acute PE    |                   |         |
| Intercept ( $\alpha_1$ )                       | 11.239            | <.001   |
| Time (Month) ( $\beta_1$ )                     | -0.028            | .71     |
| Intervention before/after ( $\beta_2$ )        | 0.870             | .65     |
| Intervention · time ( $\beta_3$ )              | 0.014             | .89     |
